# Supplementary material for: Plagued by a cryptic clock: Insight and issues from the global phylogeny of Yersinia pestis
Source: Research Square preprint supplement (doi:10.21203/rs.3.rs-1146895/v1), 2021-12-07
Supplement: Supplementary file 2 [file 3885b602d50c303e131f432d.xlsx]

## Sheet: Table S1
Table S1. Yersinia pestis population definitions according to an integrative approach using the major branches, biovars, and associated time periods. Populations are ordered based on the maximum-likelihood phylogeny, which was sorted by increasing node order. Four populations are paraphyletic (1.IN, 1.PRE, 0.ANT, 0.PE) and their descendant populations are listed.
Population	Time Period	Biovar	Major Branch	Genomes	Oldest Sampling Date	Youngest Sampling Date	Sampling Time Frame (Years)	Descendants
1.ORI	Third Pandemic	Orientalis	1	117	1924	2016	92	--
1.IN	--	Intermedium	1	39	1954	2008	54	1.ORI
1.ANT	--	Antiqua	1	4	1954	2004	50	--
1.PRE	Second Pandemic	Pre*	1	40	1270†	1800†	530	1.ORI, 1.IN, 1.ANT
2.MED	--	Medievalis	2	116	1912	2018	106	--
2.ANT	--	Antiqua	2	54	1924	2008	84	--
4.ANT	--	Antiqua	4	11	1977	2015	38	--
3.ANT	--	Antiqua	3	11	1961	2017	56	--
0.ANT4	First Pandemic	Antiqua	0	12	214†	880†	666	--
0.ANT	--	Antiqua	0	103	1947	2019	72	1.ORI, 1.IN, 1.ANT, 2.MED, 2.ANT, 3.ANT, 4.ANT, 0.ANT4
0.PE	--	Pestoides	0	85	1958	2014	56	1.ORI, 1.IN, 1.ANT, 2.MED, 2.ANT, 3.ANT, 4.ANT, 0.ANT4, 0.ANT
0.PRE	Late Neolithic Bronze Age	Pre*	0	8	-2876†	-1626†	1250	--
* Pre is not a metabolic biovar and refers to "extinct" populations where metabolic status is unknown.
† The sampling dates of ancient genomes include the 2-sigma range of radiocarbon estimates.

## Sheet: Table S2
Table S2. Model selection and log marginal likelihoods obtained from a Bayesian evaluation of temporal signal (BETS) test.
Population	Genomes	Best Model	Bayes Factor	Strict Clock No Dates	Strict Clock Dates	Relaxed Clock No Dates	Relaxed Clock Dates
1.ORI	117	Relaxed Clock Dates	35.67	-5.89969e+06	-5.89966e+06	-5.8996e+06	-5.89957e+06
1.IN	39	Relaxed Clock No Dates	-10.3314	-5.8914e+06	-5.8914e+06	-5.89134e+06	-5.89135e+06
1.ANT	4	Relaxed Clock Dates	12.6909	-5.8826e+06	-5.88259e+06	-5.88259e+06	-5.88258e+06
1.PRE	40	Relaxed Clock Dates	44.0815	-5.88814e+06	-5.88813e+06	-5.88808e+06	-5.88804e+06
2.MED	116	Relaxed Clock Dates	3.9017	-5.92084e+06	-5.92073e+06	-5.91966e+06	-5.91966e+06
2.ANT	54	Relaxed Clock No Dates	-13.3849	-5.89288e+06	-5.89289e+06	-5.89279e+06	-5.8928e+06
4.ANT	11	Relaxed Clock Dates	3.6091	-5.88603e+06	-5.88603e+06	-5.88603e+06	-5.88602e+06
3.ANT	11	Relaxed Clock No Dates	-11.172	-5.8875e+06	-5.88751e+06	-5.88749e+06	-5.88751e+06
0.ANT4	12	Relaxed Clock Dates	5.9208	-5.88953e+06	-5.88952e+06	-5.8895e+06	-5.8895e+06
0.ANT	103	Relaxed Clock Dates	13297.7	-5.89601e+06	-5.89602e+06	-5.89588e+06	-5.88258e+06
0.PE	85	Relaxed Clock Dates	12.3783	-5.9456e+06	-5.94557e+06	-5.94463e+06	-5.94461e+06
0.PRE	8	Relaxed Clock No Dates*	-2.8141	-5.89293e+06	-5.89284e+06	-5.89274e+06	-5.89274e+06
*0.PRE had temporal signal according to a strict clock, although the relaxed clock with no dates model had the highest likelihood.

## Sheet: Table S3
Table S3. Bayesian parameter estimates by population from the Markov chain Monte Carlo (MCMC) analysis. The 95% highest posterior density (HPD) interval indicates the uncertainty surrounding each estimate.
Population	Clock Model	States	Burnin (States)	tMRCA	tMRCA 95% HPD	Mean Substitution Rate (Substitutions / Site / Year)	Mean Substitution Rate 95% HPD (Substitutions / Site / Year)	Substitution Rate Standard Deviation (Substitutions / Site / Year)	Substitution Rate Standard Deviation 95% HPD (Substitutions / Site / Year)	Coefficient of Variation	Coefficient of Variation 95% HPD
1.ORI	Relaxed Clock Dates	143600000	14360000	1866.84	1806, 1901	1.29e-07	1.07e-07, 1.49e-07	1.66e-07	1.29e-07, 2.49e-07	1.38	1.09, 1.82
1.IN*	Relaxed Clock Dates	1000000000	100000000	1824.64	1651, 1913	8.66e-08	5.81e-08, 1.16e-07	1.6e-07	9.40e-08, 3.17e-07	2.15	1.29, 3.34
1.ANT	Relaxed Clock Dates	1000000000	100000000	1759.1	1655, 1835	6.48e-08	4.15e-08, 9.27e-08	-1.05e-11	0.00e+00, 1.35e-07	0.479	0.00, 2.12
1.PRE	Relaxed Clock Dates	426000000	42600000	1278.86	1214, 1315	4.77e-08	3.88e-08, 5.71e-08	8.59e-08	6.15e-08, 1.58e-07	2.06	1.38, 3.16
2.MED	Relaxed Clock Dates	371100000	37110000	1744.3	1560, 1845	2.46e-07	2.01e-07, 2.89e-07	6.87e-07	5.43e-07, 8.83e-07	2.86	2.47, 3.36
2.ANT*	Relaxed Clock Dates	1000000000	100000000	1730.64	1509, 1852	8.08e-08	5.78e-08, 1.05e-07	2.31e-07	1.35e-07, 4.50e-07	3.29	2.03, 4.95
4.ANT	Relaxed Clock Dates	1000000000	100000000	1927.27	1848, 1968	9.38e-08	4.61e-08, 1.52e-07	1.65e-07	8.73e-08, 4.05e-07	2.27	1.43, 3.53
3.ANT*	Relaxed Clock Dates	1000000000	100000000	1885.21	1769, 1947	6.88e-08	3.69e-08, 1.05e-07	1.13e-07	5.92e-08, 2.95e-07	2.18	1.21, 3.72
0.ANT4	Relaxed Clock Dates	1000000000	100000000	172.632	39, 234	3.51e-08	2.51e-08, 4.51e-08	7.25e-08	4.77e-08, 1.41e-07	2.49	1.55, 3.83
0.ANT	Relaxed Clock Dates	1000000000	100000000	1627.83	1357, 1797	5.85e-08	4.28e-08, 7.53e-08	1.03e-07	7.40e-08, 1.71e-07	1.96	1.49, 2.63
0.PE	Relaxed Clock Dates	443400000	44340000	1763.59	1573, 1876	6.15e-07	4.62e-07, 7.68e-07	1.3e-06	9.61e-07, 2.10e-06	2.29	1.83, 2.99
0.PRE	Relaxed Clock Dates	5000000000	500000000	-2891.88	-3098, -2786	5.3e-08	4.15e-08, 6.33e-08	7.27e-08	4.75e-08, 1.66e-07	1.74	9.77, 3.07
* No temporal signal from the BETS test.

## Sheet: Table S4
Table S4. Bayesian estimates of the substitution rates by population from the maximum clade credibility (MCC) trees. Rates are described in units of (1) substitutions per site per year, (2) substitutions per year, and (3) years per substitution based on 4,229,098 genomic sites.
	(1) Substitutions / Site / Year					(2) Substitutions / Year					(3) Years / Substitution
Population	Mean	Median	95% CI Low	95% CI High	Standard Deviation	Mean	Median	95% CI Low	95% CI High	Standard Deviation	Mean	Median	95% CI Low	95% CI High	Standard Deviation
1.ORI	1.41475e-07	9.65814e-08	2.81337e-08	4.37683e-07	1.37658e-07	0.59831	0.408452	0.11898	1.851	0.582168	1.67137	2.44827	0.540247	8.40477	1.71772
1.IN*	8.92015e-08	3.87527e-08	7.67347e-09	2.17027e-07	1.92467e-07	0.377242	0.163889	0.0324519	0.91783	0.813964	2.65082	6.1017	1.08953	30.8149	1.22856
1.ANT	5.55561e-08	6.32264e-08	1.89679e-08	6.80832e-08	2.45886e-08	0.234952	0.267391	0.0802172	0.287931	0.103987	4.25618	3.73984	3.47306	12.4661	9.61654
1.PRE	5.10977e-08	2.48699e-08	8.42285e-09	1.83509e-07	9.54591e-08	0.216097	0.105177	0.0356211	0.776079	0.403706	4.62755	9.50776	1.28853	28.0733	2.47705
2.MED	3.44984e-07	7.15083e-08	7.51223e-09	1.99194e-06	1.02371e-06	1.45897	0.302416	0.03177	8.4241	4.32939	0.685414	3.30671	0.118707	31.4763	0.23098
2.ANT*	1.00519e-07	2.84892e-08	4.59759e-09	2.12155e-07	3.47072e-07	0.425104	0.120484	0.0194437	0.897223	1.4678	2.35236	8.29988	1.11455	51.4306	0.68129
4.ANT	1.30869e-07	5.45973e-08	2.31221e-09	7.78697e-07	2.60543e-07	0.553459	0.230897	0.00977858	3.29319	1.10186	1.80682	4.33093	0.303657	102.264	0.907554
3.ANT*	1.53577e-07	7.06409e-08	5.12823e-09	2.18913e-07	3.27304e-07	0.649492	0.298747	0.0216878	0.925804	1.3842	1.53967	3.34731	1.08014	46.1089	0.722438
0.ANT4	6.89832e-08	1.76976e-08	4.30581e-10	3.14231e-07	1.69707e-07	0.291737	0.0748449	0.00182097	1.32891	0.717708	3.42775	13.361	0.752494	549.158	1.39332
0.ANT	3.58233e-08	1.67941e-08	1.02863e-08	9.20394e-08	7.4219e-08	0.1515	0.071024	0.0435018	0.389244	0.313879	6.60065	14.0797	2.56908	22.9875	3.18594
0.PE	8.62946e-07	2.14106e-07	2.74556e-08	4.18987e-06	1.84787e-06	3.64948	0.905474	0.116113	17.7194	7.81481	0.274012	1.10439	0.0564354	8.61233	0.127962
0.PRE	8.11612e-08	6.23345e-08	6.90086e-09	2.14737e-07	8.31525e-08	0.343239	0.263619	0.0291844	0.908142	0.35166	2.91342	3.79336	1.10115	34.2649	2.84365
* No temporal signal from the BETS test.

## Sheet: Table S5
Table S5. Bayesian estimates of the time to most recent common ancestor (tMRCA) by population from the maximum clade credibility (MCC) trees.
	tMRCA
Population	Mean	Median	95% HPD	Range
1.ORI	1867	1875	1802, 1911	1606, 1919
1.IN*	1825	1849	1648, 1931	662, 1944
1.ANT	1759	1767	1645, 1855	1323, 1889
1.PRE	1279	1287	1208, 1322	902, 1329
2.MED	1713	1750	1443, 1874	307, 1905
2.ANT*	1723	1756	1475, 1883	317, 1922
4.ANT	1927	1938	1847, 1975	1516, 1977
3.ANT*	1885	1902	1769, 1960	1145, 1961
0.ANT4	173	195	39, 237	-373, 237
First Pandemic MRCA	386	399	272, 465	40474
0.ANT	1629	1658	1349, 1851	464, 1941
0.PE	1767	1790	1561, 1906	531, 1951
0.PRE	-2852	-2829	-3000, -2777	-3408, -2777
* No temporal signal from the BETS test.

## Sheet: Table S6
Table S6. Geographic structure of Yersinia pestis populations according to the number of samples with a closest relative collected from the same location.
			Continent				Country				Province
Population	Total Samples	Non-Human Samples	Samples	Distinct Locations	Same*	%	Samples	Distinct Locations	Same*	%	Samples	Distinct Locations	Same*	%
1.ORI	117	74	117	5	104	89	117	14	99	85	112	26	67	60
1.IN	39	85	39	1	39	100	39	1	39	100	39	5	34	87
1.ANT	4	50	4	1	4	100	4	3	2	50	1	1	0	0
1.PRE	40	0	40	1	40	100	40	11	22	55	40	17	22	55
2.MED	116	85	116	2	88	76	116	9	70	60	110	38	37	34
2.ANT	54	69	54	2	52	96	54	4	49	91	54	10	47	87
4.ANT	11	91	11	2	9	82	11	2	9	82	11	3	9	82
3.ANT	11	91	11	1	11	100	11	2	11	100	11	7	5	45
0.ANT4	12	0	12	2	11	92	12	5	10	83	12	5	10	83
0.ANT	103	100	103	1	103	100	103	2	100	97	99	4	95	96
0.PE	86	93	86	2	85	99	86	8	77	90	84	20	63	75
0.PRE	8	0	8	1	8	100	8	4	3	38	8	6	3	38
* Number of samples with a closest relative collected from the same location.

## Sheet: Table S7
Table S7. Ancestral location estimation by independently fitting three discrete migration models to the maximum likelihood phylogeny using the sampling locations by: (1) continent, (2) country, and (3) province.
		Continent				Country				Province
Population	Total Samples	MRCA	Confidence	Diverged From	Confidence	MRCA	Confidence	Diverged From	Confidence	MRCA	Confidence	Diverged From	Confidence
1.ORI	117	Asia	100	Asia	100	China	100	China	100	Yunnan, China	99	Yunnan, China	100
1.IN	39	Asia	100	Asia	63	China	100	China	41	Qinghai, China	100	Qinghai, China	39
1.ANT	4	Africa	100	Asia	63	Kenya	44	China	41	Nairobi, Kenya	56	Qinghai, China	39
1.PRE	40	Europe	98	Asia	91	Russia	63	China	93	Tatarstan, Russia	37	Xinjiang, China	64
2.MED	116	Asia	92	Asia	95	China	94	China	96	Xinjiang, China	59	Xinjiang, China	57
2.ANT	54	Asia	100	Asia	95	China	100	China	96	Inner Mongolia, China	50	Xinjiang, China	57
4.ANT	11	Asia	59	Asia	96	Russia	97	China	92	Tuva Republic, Russia	68	Xinjiang, China	34
3.ANT	11	Asia	100	Asia	96	China	95	China	92	Qinghai, China	32	Xinjiang, China	34
0.ANT4	12	Asia	97	Asia	100	Kyrgyzstan	69	China	57	Issyk-Kul Region, Kyrgzstan	71	Xinjiang, China	50
0.ANT	103	Asia	100	Asia	100	China	92	China	64	Xinjiang, China	76	Qinghai, China	42
0.PE	86	Asia	94	Europe	52	Russia	71	Russia	85	Qinghai, China	99	Qinghai, China	56
0.PRE*	8	Europe	99	--	--	Russia	100	--	--	Krasnoyarsk Krai, Russia	49	--	--
* 0.PRE is the most basal population and we could not estimate the divergence location.
